# Supplementary material for: Absorption and anti-bacterial studies of an acetylene-functionalized Schiff base for detection of Sn(ii) and inhibition of E. coli
Source: Royal Society of Chemistry journal article supplement (doi:10.1039/d4nj04322g), 2025-01-01
Supplement: d4nj04322g1.pdf [file d4nj04322g1.pdf]

## **Absorption and anti-bacterial studies of acetylene functionalized Schiff base for recognition of Sn (II) and inhibition of *E. coli***

Gurjaspreet Singh<sup>a\*</sup>, Pallavi Markan<sup>a\*</sup>, Navneet Kaur<sup>a\*</sup>, Sofia Gupta<sup>c</sup>, Tamana<sup>a</sup>, Pooja Malik<sup>a</sup>, Subash Chandra Sahoo<sup>a</sup>, Baljinder Singh Gill<sup>b</sup>, Deepanjali Baliyan<sup>b</sup>

<sup>a</sup>Department of Chemistry, Panjab University, Chandigarh, 160014, India

<sup>b</sup>Department of Biochemistry, Central University of Punjab, Bathinda, Punjab-151401, India.

<sup>c</sup>Department of Applied Science, Division of Research & Innovation, Chandigarh college Engineering, Chandigarh Group of colleges Jhanjeri, Mohali, Punjab-140307, India

\*Corresponding Authors

\*Prof. Gurjaspreet Singh

Department of Chemistry & Centre of Advanced Studies

Panjab University, Chandigarh, India

Email: [gjsingh@pu.ac.in](mailto:gjsingh@pu.ac.in)

Tel. No: 0172-2534428, 09814302099, 9317502099

Fax No: 0172-2545074

\*Miss Pallavi Markan

Research Scholar

Department of Chemistry & Centre of Advanced Studies

Panjab University, Chandigarh, India

Email: [pallavimarkan094@gmail.com](mailto:pallavimarkan094@gmail.com)

Tel. No: 8847393192

\*Prof. Navneet Kaur

Department of Chemistry & Centre of Advanced Studies

Panjab University, Chandigarh, India

Email: [neet\\_chem@pu.ac.in](mailto:neet_chem@pu.ac.in)

Tel. No: 2534430, 9463518290

## Table of content

| Content                                                                                                                                                                                                                                | Figure/Table     |
|----------------------------------------------------------------------------------------------------------------------------------------------------------------------------------------------------------------------------------------|------------------|
| <b><sup>1</sup>H-NMR of compound 4</b>                                                                                                                                                                                                 | <b>Figure S1</b> |
| <b><sup>13</sup> C-NMR of compound 4</b>                                                                                                                                                                                               | <b>Figure S2</b> |
| <b>Mass spectra of compound 4</b>                                                                                                                                                                                                      | <b>Figure S3</b> |
| <b>Mass spectra of complex</b>                                                                                                                                                                                                         | <b>Figure S4</b> |
| <b>Ant interference Studies</b>                                                                                                                                                                                                        | <b>Figure S5</b> |
| <b>Absorption spectra of Different water samples at 10<sup>-1</sup>M of Sn</b>                                                                                                                                                         | <b>Figure S6</b> |
| <b>Absorption spectra of Different water samples at 10<sup>-2</sup>M of Sn</b>                                                                                                                                                         | <b>Figure S7</b> |
| <b>Absorption spectra of Different water samples at 10<sup>-3</sup>M of Sn</b>                                                                                                                                                         | <b>Figure S8</b> |
| <b>Table Hydrophobic interactions</b>                                                                                                                                                                                                  | <b>Table S1</b>  |
| <b>Table Crystal data and structure refinement for compound 4</b>                                                                                                                                                                      | <b>Table S2</b>  |
| <b>Table Fractional Atomic coordinates (x 10<sup>4</sup>) and equivalent isotropic displacement parameters (Å<sup>2</sup>x 10<sup>3</sup>) for compound 4</b>                                                                          | <b>Table S3</b>  |
| <b>Table Anisotropic Displacement Parameters (Å<sup>2</sup>x 10<sup>3</sup>) for compound 4. The Anisotropic displacement factor exponent takes the form: <math>-2\pi^2 [ h^2 a^* 2 U_{11} + 2 h k a^* b^* U_{12} + \dots ]</math></b> | <b>Table S4</b>  |
| <b>Table Bond Lengths for Compound 4.</b>                                                                                                                                                                                              | <b>Table S5</b>  |

|                                             |                 |
|---------------------------------------------|-----------------|
| <b>Table Bond Angles for Compound 4.</b>    | <b>Table S6</b> |
| <b>Table Torsion Angles for Compound 4.</b> | <b>Table S7</b> |

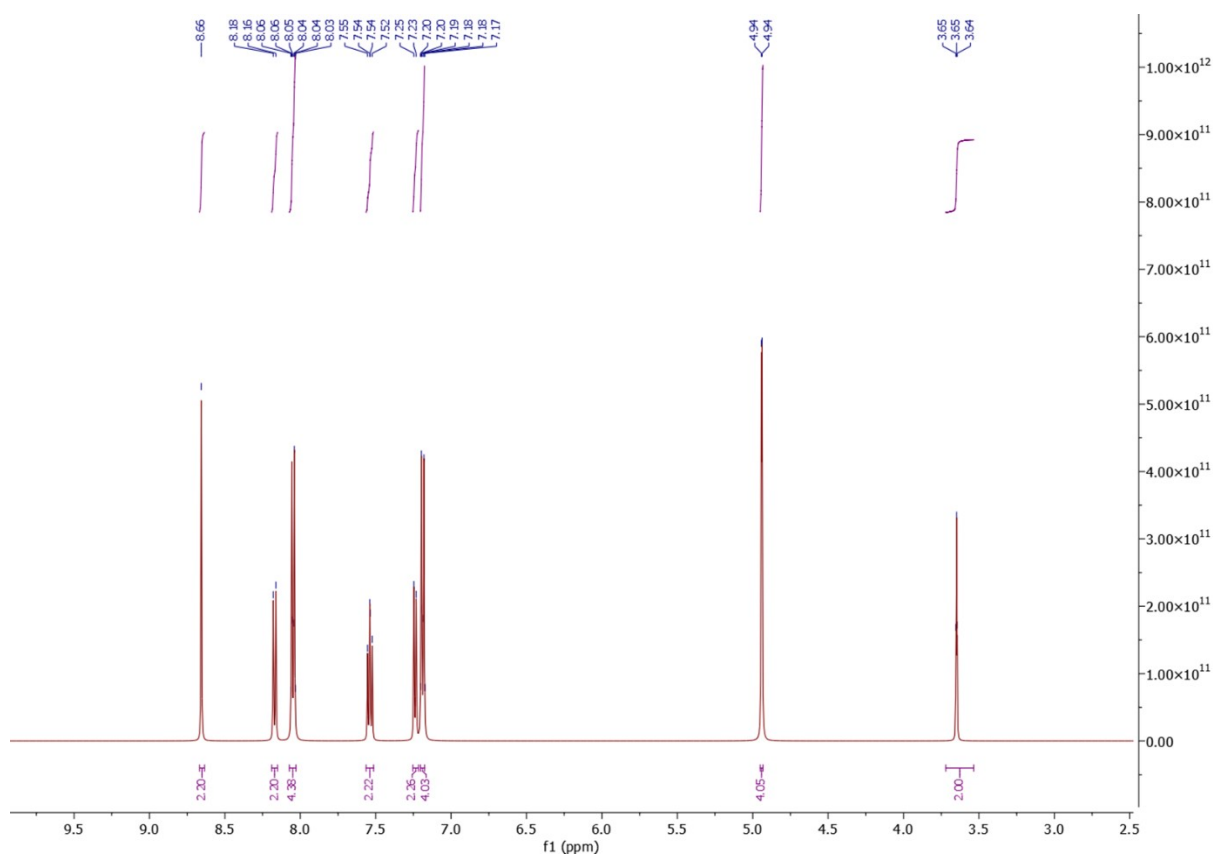

**Figure S1: <sup>1</sup>H-NMR of compound 4**

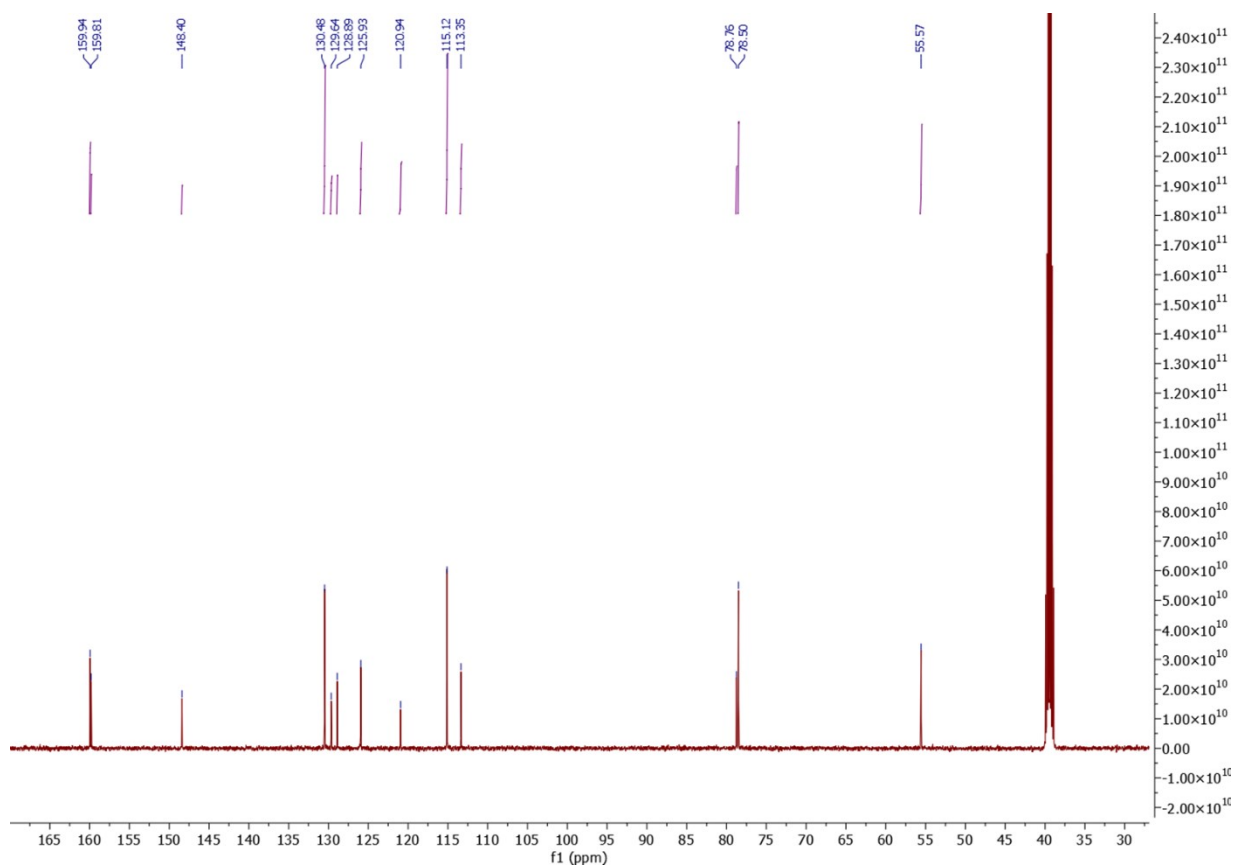

**Figure S2: <sup>13</sup>C-NMR of compound 4**

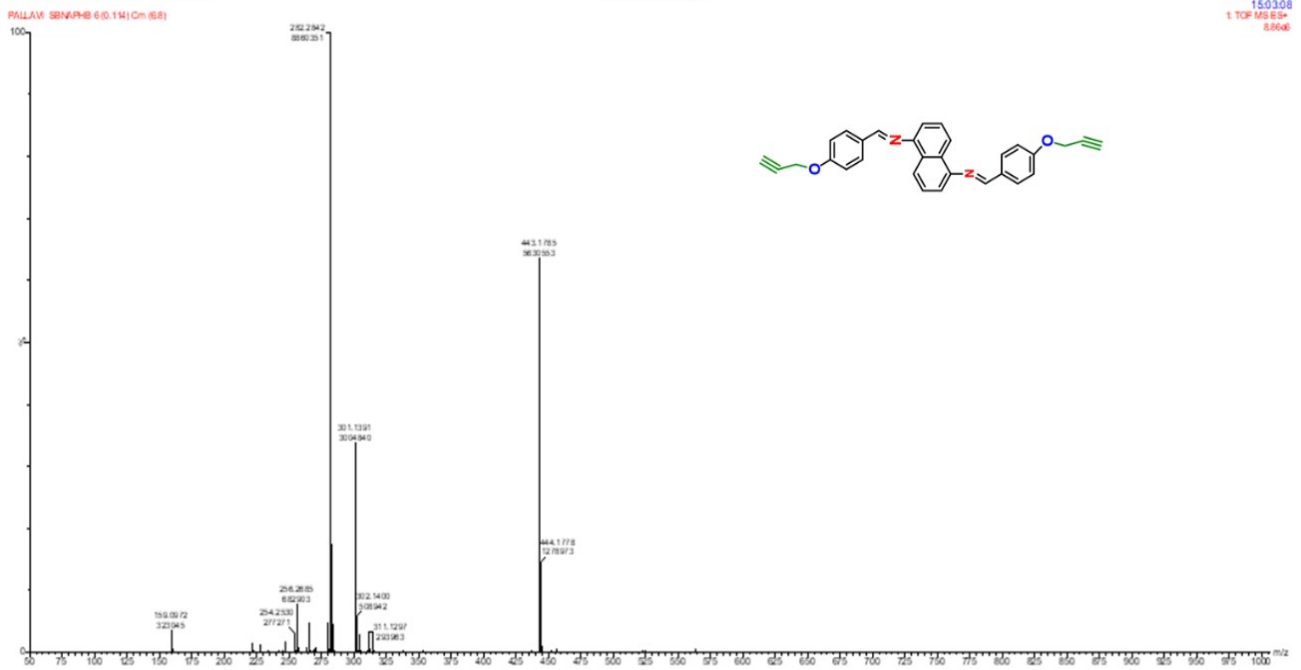

Figure S3: Mass Spectra of compound 4

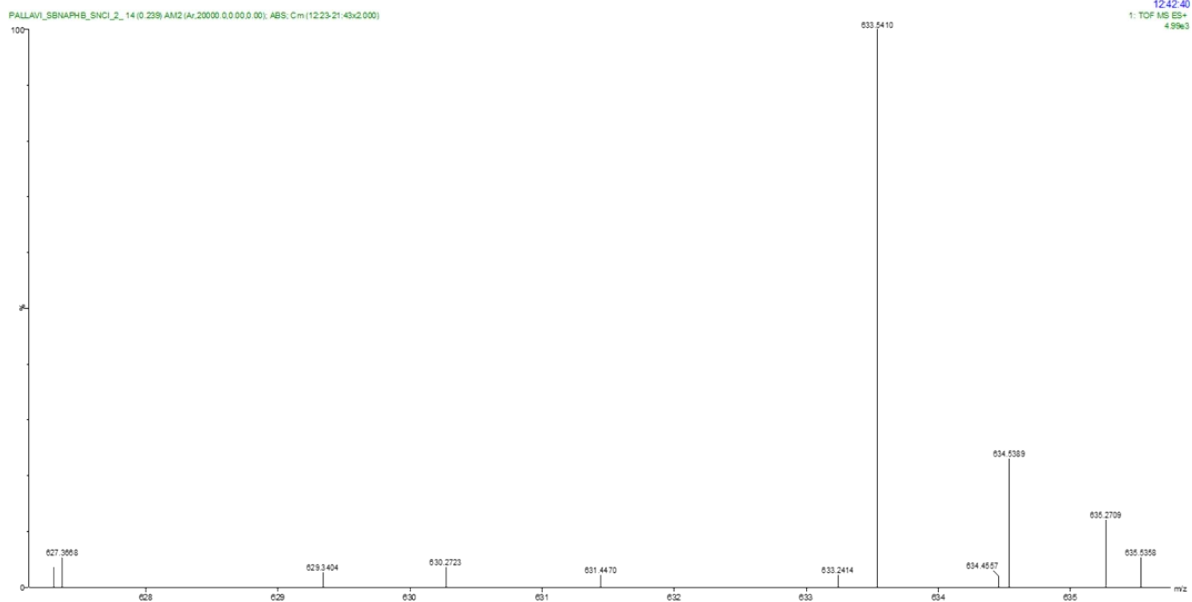

Figure S4 Mass Spectra of Metal complex

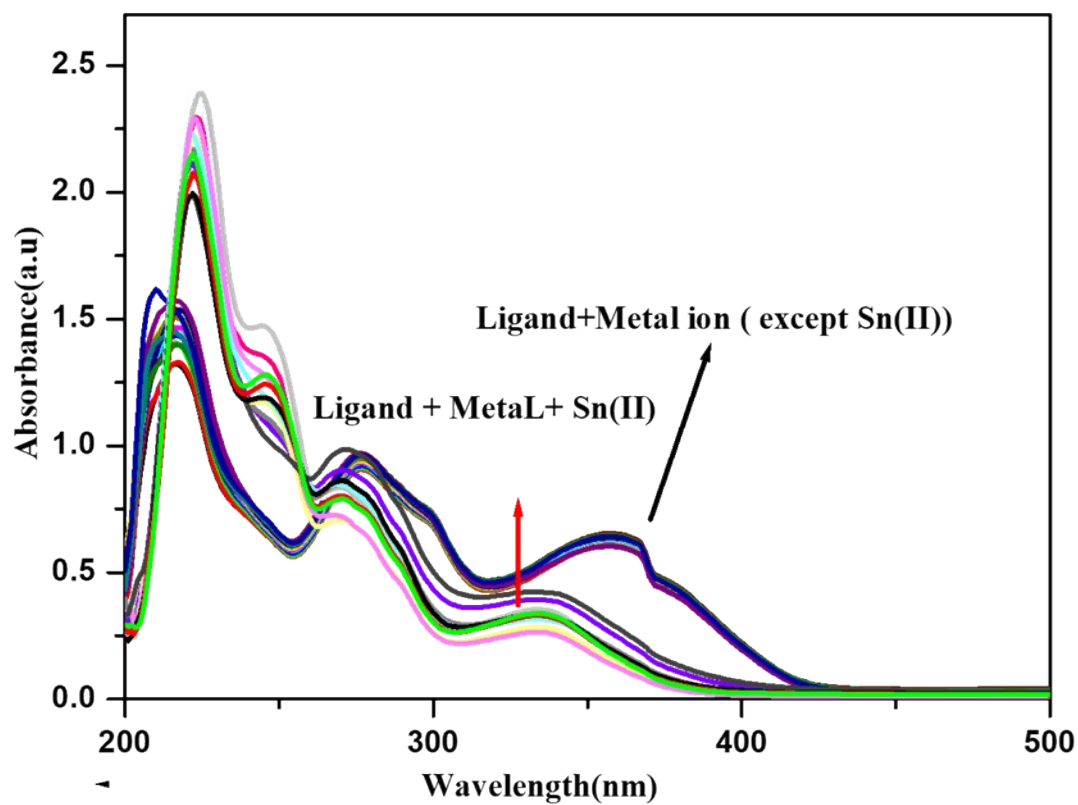

Fig. S 5 Anti interference studies

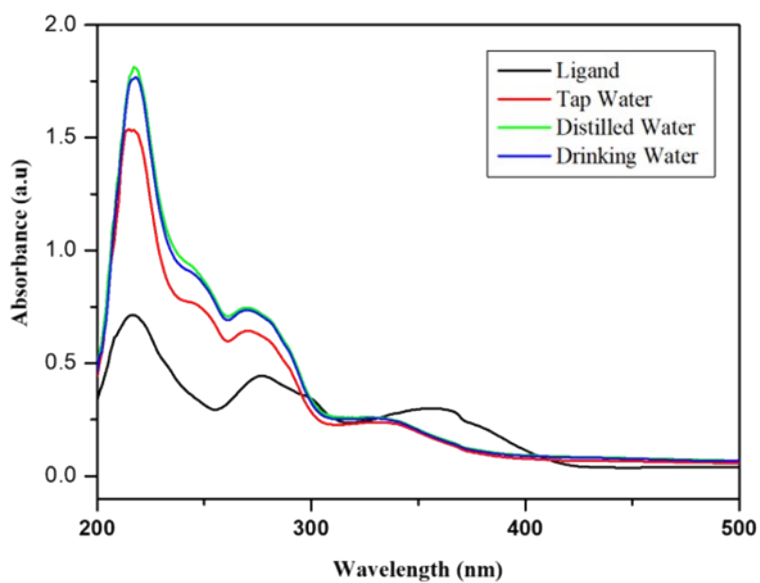

**Fig S 6 Absorption spectra of Different water samples at  $10^{-1}$ M of Sn(II)**

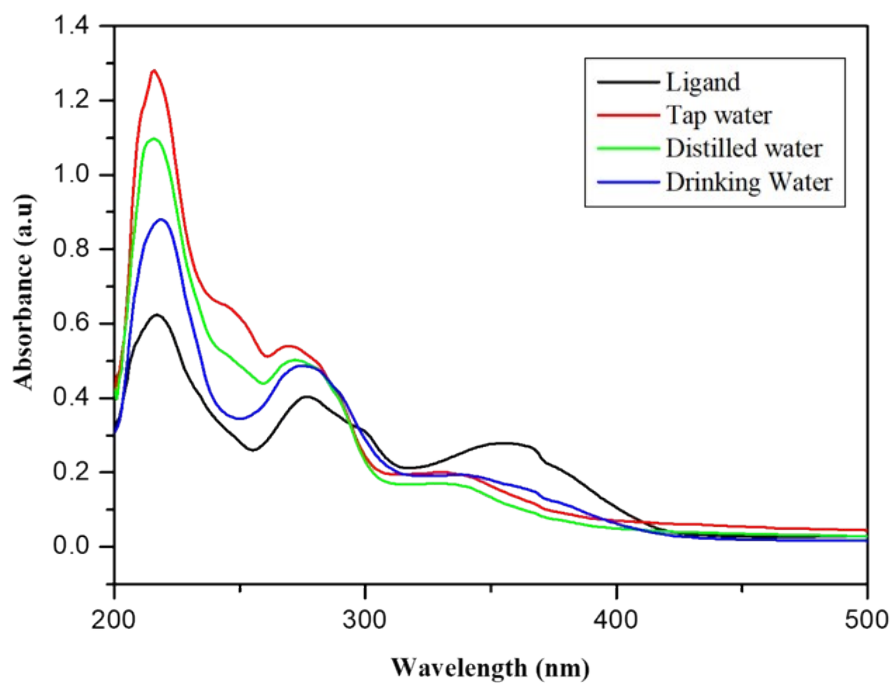

**Fig S 7 Absorption spectra of Different water samples at  $10^{-2}$ M of Sn(II).**

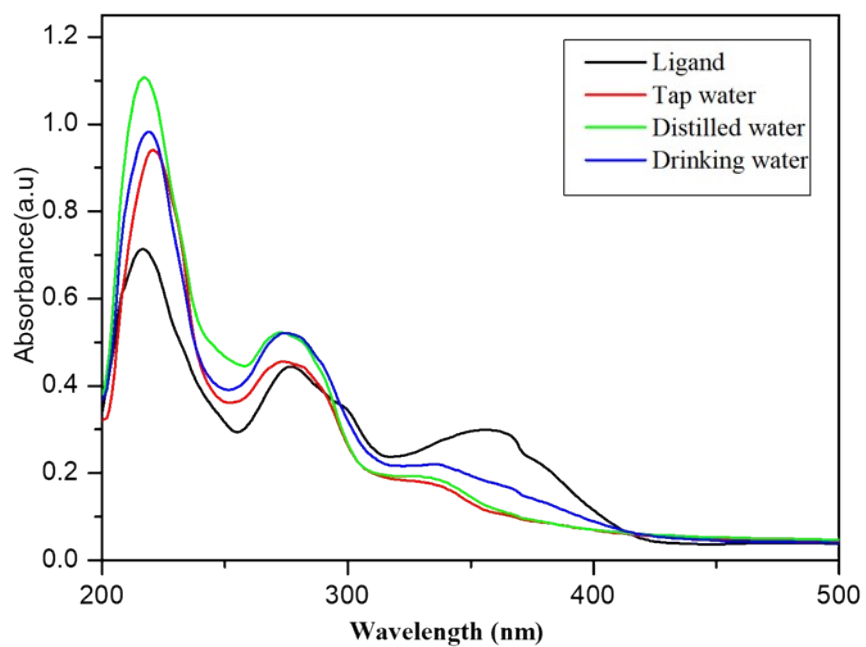

**Fig S 8 Absorption spectra of Different water samples at  $10^{-3}$ M of Sn(II).**



**Table S1 : Hydrophobic interactions**

| Index | Residue | AA  | Distance | Ligand Atom | Protein Atom |
|-------|---------|-----|----------|-------------|--------------|
| 1     | 81A     | THR | 3.51     | 2872        | 764          |
| 2     | 111A    | ALA | 3.42     | 2864        | 1010         |
| 3     | 142A    | LEU | 3.04     | 2860        | 1279         |
| 4     | 189A    | LEU | 2.98     | 2882        | 1679         |
| 5     | 189A    | LEU | 2.82     | 2866        | 1677         |
| 6     | 212A    | VAL | 3.74     | 2883        | 1890         |
| 7     | 213A    | PHE | 2.87     | 2890        | 1900         |
| 8     | 250A    | ILE | 3.32     | 2890        | 2263         |

**Table S2 Crystal data and structure refinement for compound 4**

|                                             |                                                               |
|---------------------------------------------|---------------------------------------------------------------|
| Identification code                         | try1                                                          |
| Empirical formula                           | C <sub>15</sub> H <sub>11</sub> NO                            |
| Formula weight                              | 442.50                                                        |
| Temperature/K                               | 293                                                           |
| Crystal system                              | triclinic                                                     |
| Space group                                 | P-1                                                           |
| a/Å                                         | 7.8852(8)                                                     |
| b/Å                                         | 8.5306(7)                                                     |
| c/Å                                         | 9.6708(9)                                                     |
| α/°                                         | 85.411(7)                                                     |
| β/°                                         | 78.618(8)                                                     |
| γ/°                                         | 65.654(9)                                                     |
| Volume/Å <sup>3</sup>                       | 581.01(10)                                                    |
| Z                                           | 2                                                             |
| ρ <sub>calc</sub> /cm <sup>3</sup>          | 1.265                                                         |
| μ/mm <sup>-1</sup>                          | 0.080                                                         |
| F(000)                                      | 232.1                                                         |
| Crystal size/mm <sup>3</sup>                | 0.01 × 0.008 × 0.005                                          |
| Radiation                                   | Mo Kα (λ = 0.71073)                                           |
| 2θ range for data collection/°              | 6.54 to 54.3                                                  |
| Index ranges                                | -9 ≤ h ≤ 9, -9 ≤ k ≤ 10, -12 ≤ l ≤ 12                         |
| Reflections collected                       | 8330                                                          |
| Independent reflections                     | 2417 [R <sub>int</sub> = 0.0390, R <sub>sigma</sub> = 0.0392] |
| Data/restraints/parameters                  | 2417/0/154                                                    |
| Goodness-of-fit on F <sup>2</sup>           | 0.965                                                         |
| Final R indexes [I ≥ 2σ (I)]                | R <sub>1</sub> = 0.0663, wR <sub>2</sub> = 0.2061             |
| Final R indexes [all data]                  | R <sub>1</sub> = 0.0951, wR <sub>2</sub> = 0.2249             |
| Largest diff. peak/hole / e Å <sup>-3</sup> | 0.25/-0.24                                                    |

**Table S3 Fractional Atomic coordinates ( $\times 10^4$ ) and equivalent isotropic displacement parameters ( $\text{\AA}^2 \times 10^3$ ) for compound 4**

| <b>Atom</b> | <b>x</b>  | <b>y</b>  | <b>z</b> | <b>U(eq)</b> |
|-------------|-----------|-----------|----------|--------------|
| O1          | 1990 (3)  | 10424 (3) | 9641 (2) | 79.0 (7)     |
| N1          | 7893 (4)  | 3619 (3)  | 6284 (2) | 60.5 (6)     |
| C7          | 9133 (4)  | 2384 (3)  | 5241 (3) | 54.5 (7)     |
| C11         | 10629 (4) | -637 (3)  | 4500 (3) | 52.1 (7)     |
| C10         | 11624 (4) | -157 (4)  | 3274 (3) | 60.4 (7)     |
| C2          | 3236 (4)  | 9422 (4)  | 7208 (3) | 64.3 (8)     |
| C9          | 11384 (4) | 1505 (4)  | 3071 (3) | 66.5 (8)     |
| C008        | 6843 (4)  | 5081 (4)  | 5886 (3) | 60.8 (7)     |
| C4          | 5586 (4)  | 6490 (3)  | 6850 (3) | 57.5 (7)     |
| C1          | 3155 (4)  | 9211 (4)  | 8646 (3) | 61.8 (8)     |
| C6          | 4306 (5)  | 7661 (4)  | 9187 (3) | 68.0 (8)     |
| C8          | 10143 (4) | 2779 (4)  | 4055 (3) | 62.7 (8)     |
| C3          | 4442 (4)  | 8053 (4)  | 6327 (3) | 63.3 (8)     |
| C5          | 5518 (4)  | 6322 (4)  | 8302 (3) | 63.6 (8)     |
| C13         | 1703 (5)  | 13159 (4) | 8636 (3) | 76.7 (9)     |
| C12         | 731 (5)   | 12057 (4) | 9186 (4) | 76.7 (9)     |
| C14         | 2462 (7)  | 14054 (6) | 8226 (4) | 102.3 (13)   |

**Table S4 Anisotropic Displacement Parameters ( $\text{\AA}^2 \times 10^3$ ) for compound 4. The Anisotropic displacement factor exponent takes the form:  $-2\pi^2 [h^2 a^{*2} U_{11} + 2 h k a^* b^* U_{12} + \dots]$**

| Atom | $U_{11}$ | $U_{22}$ | $U_{33}$ | $U_{12}$  | $U_{13}$  | $U_{23}$ |
|------|----------|----------|----------|-----------|-----------|----------|
| O1   | 83.7(15) | 64.3(13) | 66.8(13) | -14.3(11) | 1.2(11)   | -1.8(10) |
| N1   | 65.5(15) | 54.6(13) | 61.1(14) | -24.4(12) | -7.9(12)  | -6.1(11) |
| C7   | 56.0(16) | 53.9(15) | 56.7(15) | -23.4(13) | -13.3(13) | -2.9(12) |
| C11  | 52.2(15) | 57.4(15) | 51.7(14) | -24.8(12) | -13.8(12) | -2.2(11) |
| C10  | 61.5(17) | 64.6(17) | 56.8(16) | -28.7(14) | -4.5(13)  | -7.0(13) |
| C2   | 58.9(17) | 62.0(17) | 65.9(18) | -15.9(14) | -18.1(14) | 3.0(14)  |
| C9   | 72(2)    | 71.1(19) | 61.8(17) | -38.5(16) | -3.1(15)  | 1.0(14)  |
| C008 | 61.2(17) | 64.4(18) | 59.5(17) | -27.6(15) | -10.1(14) | -5.1(14) |
| C4   | 58.9(17) | 56.1(16) | 61.6(16) | -27.2(13) | -10.7(13) | -1.3(13) |
| C1   | 59.3(17) | 57.3(16) | 63.8(18) | -22.3(14) | -1.9(14)  | -3.4(14) |
| C6   | 82(2)    | 61.9(18) | 53.7(16) | -26.6(16) | -6.3(15)  | 8.7(14)  |
| C8   | 70.5(19) | 58.5(16) | 64.2(17) | -32.1(15) | -10.5(15) | 1.0(13)  |
| C3   | 65.5(18) | 68.0(18) | 55.7(16) | -23.5(15) | -19.0(14) | 3.8(14)  |
| C5   | 70.4(19) | 55.6(16) | 59.9(17) | -23.0(15) | -8.5(14)  | 4.8(13)  |
| C13  | 86(2)    | 67(2)    | 73(2)    | -24.6(19) | -22.7(18) | 3.1(17)  |
| C12  | 64(2)    | 64.8(19) | 86(2)    | -13.4(16) | -6.4(17)  | -4.5(16) |
| C14  | 131(4)   | 107(3)   | 91(3)    | -67(3)    | -34(3)    | 17(2)    |

**Table S5 Bond Lengths for Compound 4.**

| <b>Atom</b> | <b>Atom</b>      | <b>Length/Å</b> | <b>Atom</b> | <b>Atom</b> | <b>Length/Å</b> |
|-------------|------------------|-----------------|-------------|-------------|-----------------|
| O1          | C1               | 1.367 (3)       | C2          | C3          | 1.385 (4)       |
| O1          | C12              | 1.433 (4)       | C9          | C8          | 1.402 (4)       |
| N1          | C7               | 1.420 (3)       | C008        | C4          | 1.459 (4)       |
| N1          | C008             | 1.260 (4)       | C4          | C3          | 1.388 (4)       |
| C7          | C11 <sup>1</sup> | 1.431 (4)       | C4          | C5          | 1.392 (4)       |
| C7          | C8               | 1.364 (4)       | C1          | C6          | 1.390 (4)       |
| C11         | C11 <sup>1</sup> | 1.415 (5)       | C6          | C5          | 1.373 (4)       |
| C11         | C10              | 1.417 (4)       | C13         | C12         | 1.452 (5)       |
| C10         | C9               | 1.354 (4)       | C13         | C14         | 1.154 (5)       |
| C2          | C1               | 1.379 (4)       |             |             |                 |

<sup>1</sup>2-X,-Y,1-Z

**Table S6 Bond Angles for Compound 4.**

| Atom             | Atom | Atom             | Angle/°   | Atom | Atom | Atom | Angle/°   |
|------------------|------|------------------|-----------|------|------|------|-----------|
| C12              | O1   | C1               | 118.7 (2) | C5   | C4   | C008 | 121.5 (3) |
| C008             | N1   | C7               | 118.4 (2) | C5   | C4   | C3   | 118.4 (3) |
| C11 <sup>1</sup> | C7   | N1               | 117.2 (2) | C2   | C1   | O1   | 125.3 (3) |
| C8               | C7   | N1               | 123.2 (2) | C6   | C1   | O1   | 114.6 (3) |
| C8               | C7   | C11 <sup>1</sup> | 119.6 (2) | C6   | C1   | C2   | 120.1 (3) |
| C11 <sup>1</sup> | C11  | C7 <sup>1</sup>  | 118.8 (3) | C5   | C6   | C1   | 120.5 (3) |
| C10              | C11  | C7 <sup>1</sup>  | 121.7 (2) | C9   | C8   | C7   | 121.1 (3) |
| C9               | C10  | C11              | 120.2 (3) | C4   | C3   | C2   | 121.8 (3) |
| C3               | C2   | C1               | 118.8 (3) | C6   | C5   | C4   | 120.3 (3) |
| C8               | C9   | C10              | 120.9 (3) | C14  | C13  | C12  | 178.5 (4) |
| C4               | C008 | N1               | 123.7 (3) | C13  | C12  | O1   | 112.1 (3) |
| C3               | C4   | C008             | 120.1 (3) |      |      |      |           |

<sup>1</sup>2-X,-Y,1-Z**Table S7 Torsion Angles for Compound 4.**

| A                  | B                | C                | D | Angle/°    | A                | B   | C   | D    | Angle/°    |
|--------------------|------------------|------------------|---|------------|------------------|-----|-----|------|------------|
| O1C1               | C2               | C3               |   | -177.7 (3) | C7 <sup>1</sup>  | C11 | C10 | C9   | -179.1 (3) |
| O1C1               | C6               | C5               |   | 178.8 (3)  | C7               | C8  | C9  | C10  | -0.4 (4)   |
| N1C7               | C11 <sup>1</sup> | C11              |   | -178.5 (3) | C11 <sup>1</sup> | C11 | C10 | C9   | 0.7 (4)    |
| N1C7               | C11 <sup>1</sup> | C10 <sup>1</sup> |   | 1.7 (3)    | C11              | C10 | C9  | C8   | -0.6 (3)   |
| N1C7               | C8               | C9               |   | 178.5 (3)  | C2               | C1  | C6  | C5   | -0.7 (4)   |
| N1C008             | C4               | C3               |   | -178.6 (3) | C2               | C3  | C4  | C008 | -179.8 (3) |
| N1C008             | C4               | C5               |   | 2.4 (4)    | C2               | C3  | C4  | C5   | -0.7 (3)   |
| C7C11 <sup>1</sup> | C11              | C7 <sup>1</sup>  |   | -180.0 (3) | C008             | C4  | C5  | C6   | -179.2 (3) |
| C7C11 <sup>1</sup> | C11              | C10              |   | 0.2 (3)    | C4               | C5  | C6  | C1   | -1.1 (4)   |

<sup>1</sup>2-X,-Y,1-Z
